# Supplementary material for: BACE1 Deficiency Causes Abnormal Neuronal Clustering in the Dentate Gyrus
Source: PubMed Central journal article supplement — Stem Cell Reports. 2017 Jun 29;9(1):217–30. doi: 10.1016/j.stemcr.2017.05.030 (PMC5511112; doi:10.1016/j.stemcr.2017.05.030), 2017-06-29
Supplement: mmc1.pdf [file mmc1.pdf]

**Stem Cell Reports, Volume 9**

**Supplemental Information**

**BACE1 Deficiency Causes Abnormal Neuronal Clustering in the Dentate Gyrus**

**Hailong Hou, Qingyuan Fan, Wanxia He, Hoonkyo Suh, Xiangyou Hu, and Riqiang Yan**

## **Supplemental Figure and Text**

### **BACE1 deficiency causes abnormal neuronal clustering in the dentate gyrus**

Hailong Hou<sup>1</sup>, Qingyuan Fan<sup>1</sup>, Wanxia He<sup>1</sup>, Hoonkyo Suh<sup>2</sup>, Xiangyou Hu<sup>1</sup> and Riqiang Yan<sup>1\*</sup>

<sup>1</sup>Department of Neurosciences, Lerner Research Institute, Cleveland Clinic, Cleveland, OH 44195; <sup>2</sup>Department of Stem Cell Biology and Regenerative Medicine, Lerner Research Institute, Cleveland Clinic, Cleveland, OH 44195

\* **Correspondence should be addressed to:** Riqiang Yan, Ph.D., Department of Neurosciences, Lerner Research Institute, Cleveland Clinic, 9500 Euclid Avenue/NC30, Cleveland, OH 44195  
Tel: 216-445-2690, Fax: 216-444-7927, email: [yanr@ccf.org](mailto:yanr@ccf.org).

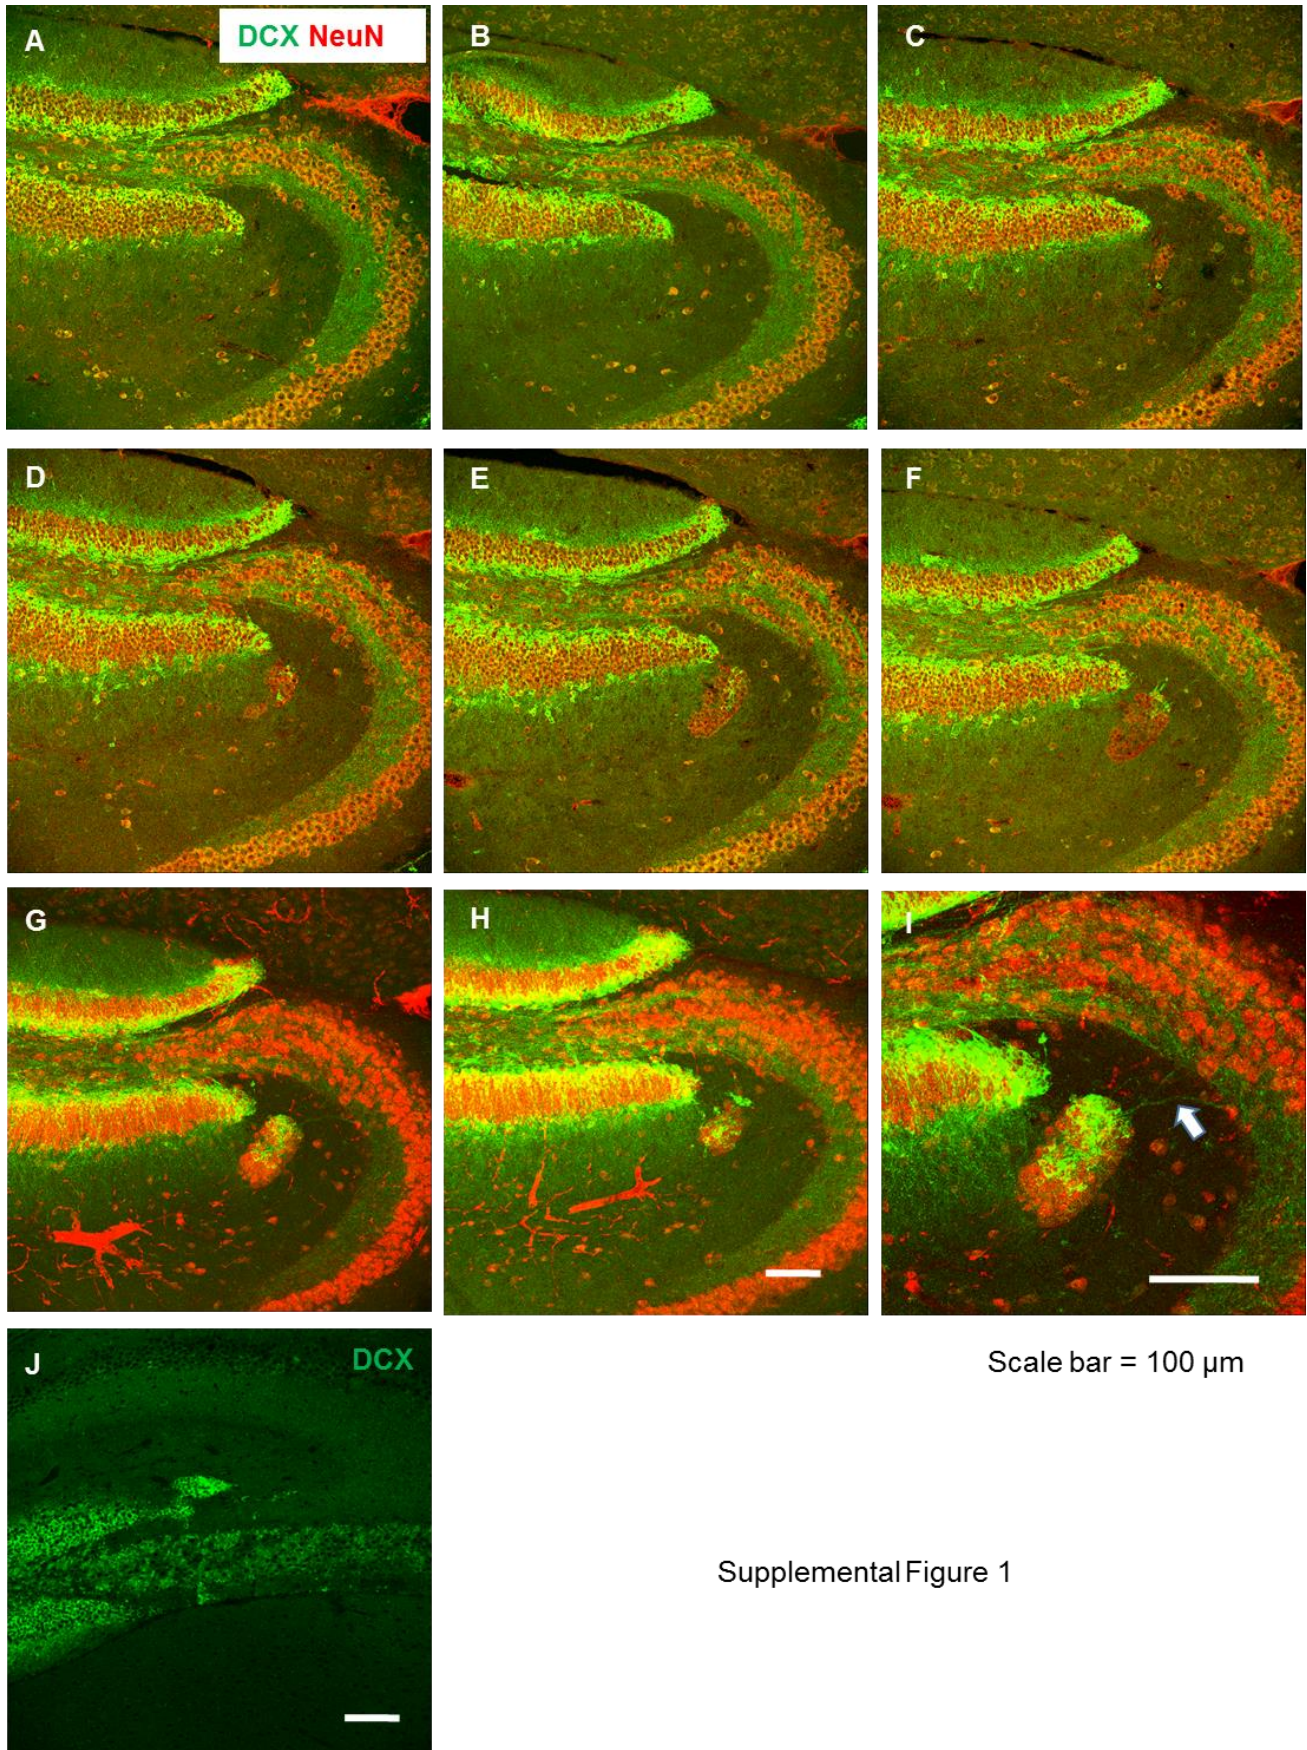

**Supplemental Figure 1: The presence of neuronal clusters near the mossy fiber side of the DG molecular layer.** Continuous brain sections [14- $\mu\text{m}$  (**A-F**) and 50- $\mu\text{m}$  (**G-H**) thick] from one-month-old BACE1-null mice were labeled with DCX and NeuN antibodies. DCX<sup>+</sup> clusters were sporadically found in the DG molecular layer, which is close to mossy fibers. The inset in **G** is shown in **I**. In another case, clusters are shown in connection with the GCL (**J**), likely due to a break from GCL or incomplete fusion with GCL. Scale bar is 100  $\mu\text{m}$ .

**Supplemental Table 1: Summary of doublecortin-positive clusters seen in BACE1-null mice and related analyses**

| Phenotype                                                          | BACE1 <sup>+/+</sup>                                                                                                                                                                                                                                    | BACE1 <sup>-/-</sup>                                                                                                                                                                                                                                                                                                                                                                                       |
|--------------------------------------------------------------------|---------------------------------------------------------------------------------------------------------------------------------------------------------------------------------------------------------------------------------------------------------|------------------------------------------------------------------------------------------------------------------------------------------------------------------------------------------------------------------------------------------------------------------------------------------------------------------------------------------------------------------------------------------------------------|
| Doublecortin-positive neuronal clusters in SPZ/MZ of dentate gyrus | <p>Positive: 6 of 49 BACE1<sup>+/+</sup> mice. (ages from P6 to P11)</p> <p>The number of clusters in BACE1<sup>+/+</sup> mice was small and mostly small in size.</p> <p>Clusters have not been detected in mice older than 1 month (12 examined).</p> | <p>Positive: 65 out of a total of 68 BACE1<sup>-/-</sup> brains (ages P6 to 11M).</p> <p>Negative: 1 from 11M and 2 from P3 brains.</p> <p>Easy to detect in sagittal sections: for example, lateral 0.36 mm-1.92 mm in P20 mice.</p> <p>Some immature clusters in SPZ/MZ can differentiate into mature neurons and may exist throughout life (age of the oldest mice examined in this study was 11M).</p> |
| Pseudo dentate gyrus                                               | Never detected.                                                                                                                                                                                                                                         | <p>Detected in 6 out of 29 BACE1<sup>-/-</sup> brains.</p> <p>The age range examined was P11 to 6M (1 in 7 P11, 1 at P20, 2 at P30, 1 at P60, and 1 at P180).</p> <p>The pseudo dentate gyrus was most likely found in brain sections between lateral 0.84 mm to lateral 1.92 mm*.</p>                                                                                                                     |
| Reelin-positive cells in the dentate gyrus                         | <p>The majority of reelin-positive cells resides in the SPZ/MZ region.</p> <p>The number decreased sharply during postnatal development.</p>                                                                                                            | <p>The expression and distribution pattern of reelin-positive cells were similar to those in WT mice.</p> <p>The number of reelin-positive cells was similar between WT and BACE1<sup>-/-</sup> mice in 3 different age groups.</p> <p>DCX-positive clusters were always adjacent to reelin-positive cells, and no reelin-positive cells in clusters were labeled.</p>                                     |
